# Supplementary material for: Molecular Activation of the Kv11.1 Channel Reprograms EMT in Colon Cancer by Inhibiting TGFβ Signaling via Activation of Calcineurin
Source: MDPI journal article supplement (doi:10.3390/cancers13236025), 2021-11-30
Supplement: s1 [file s1]

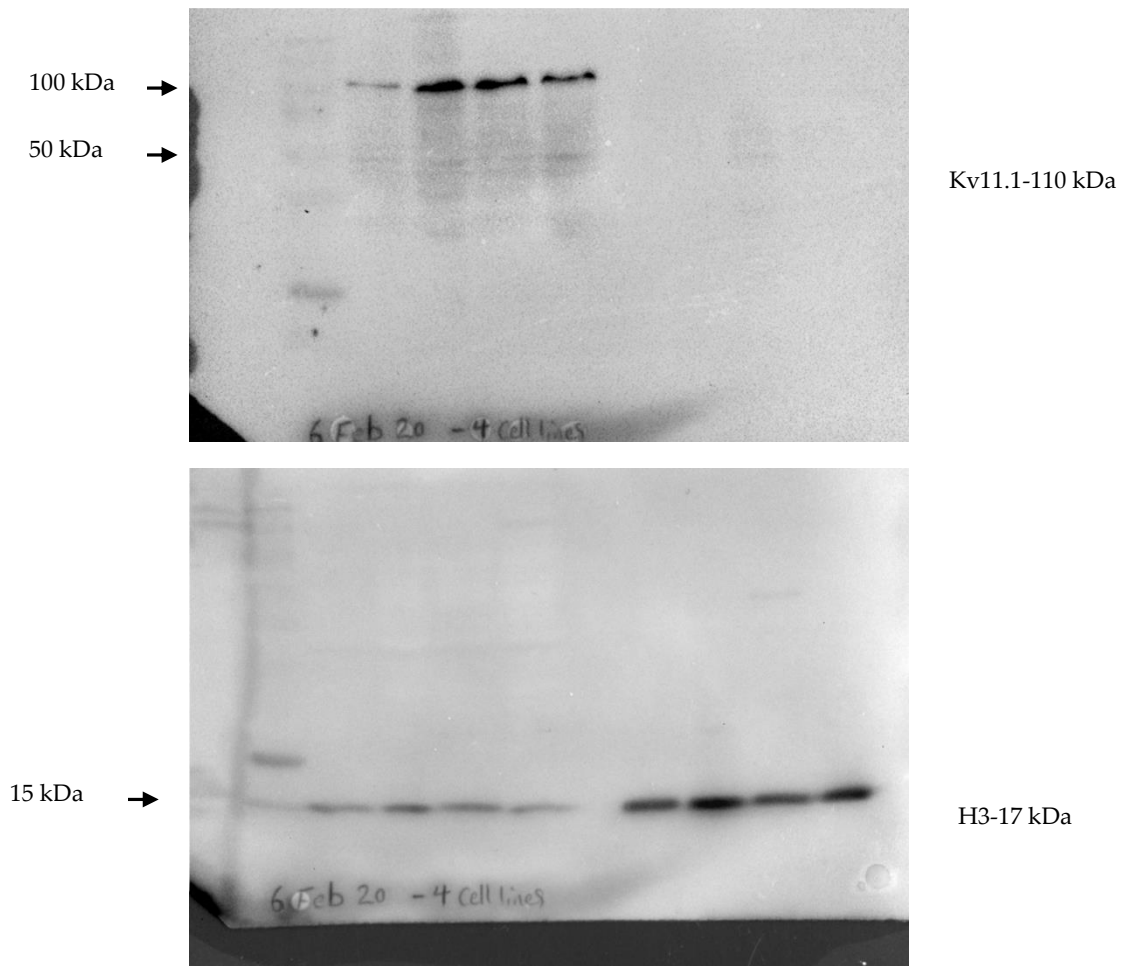

**Figure 1. (A)**

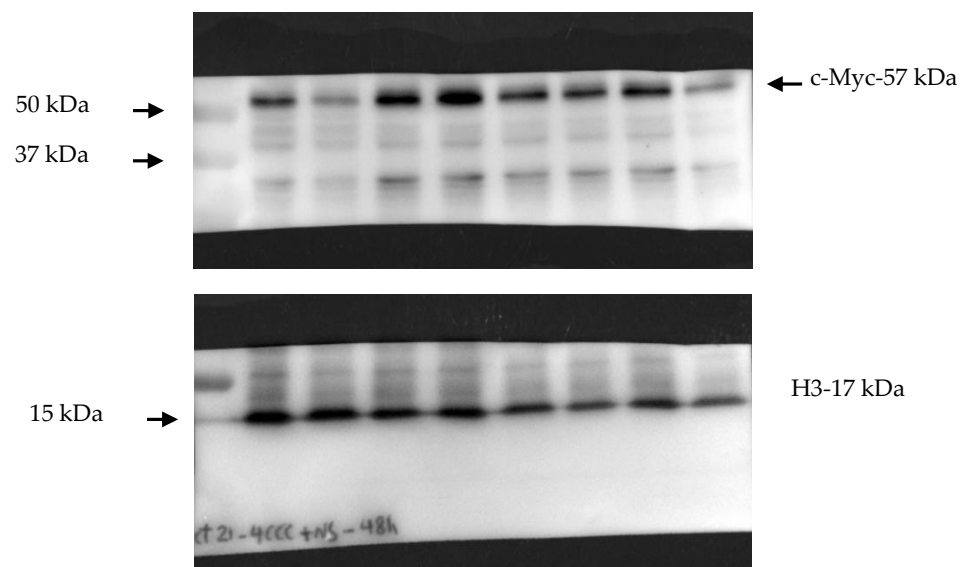

**Figure 2. (B)**

|       | HT29-DMSO | HT29-NS1643 | SW480-DMSO | SW480-NS1643 | FET-DMSO | FET-NS1643 |
|-------|-----------|-------------|------------|--------------|----------|------------|
| c-Myc | 0.69      | 0.23        | 1.24       | 1.20         | 1.13     | 0.32       |

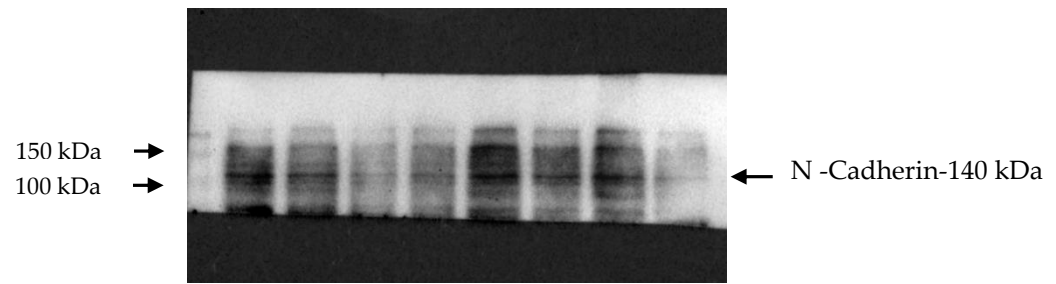

Short exposure time

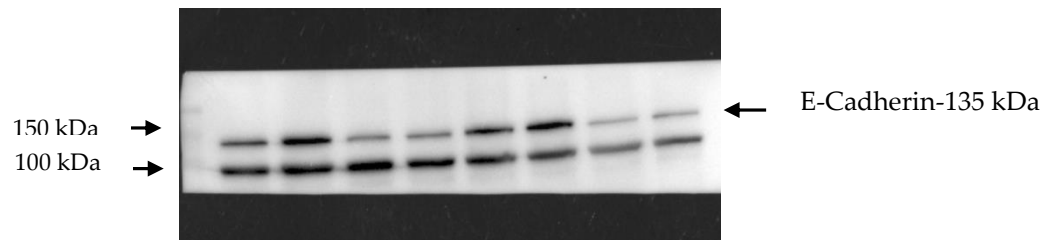

Long exposure time for FET cells

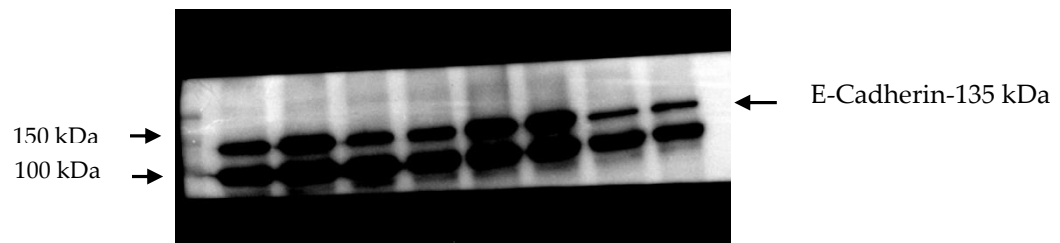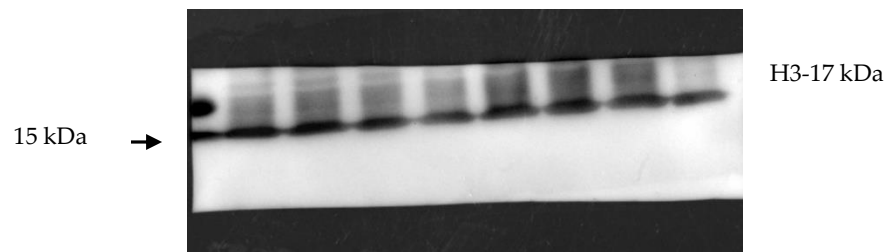

**Figure 3. (C)**

|             | HT29-DMSO | HT29-NS1643 | SW480-DMSO | SW480-NS1643 | FET-DMSO | FET-NS1643 |
|-------------|-----------|-------------|------------|--------------|----------|------------|
| N -Cadherin | 0.19      | 0.13        | 0.15       | 0.35         | 0.10     | 0.04       |
| E -Cadherin | 0.33      | 0.65        | 0.24       | 0.27         | 0.14     | 0.27       |

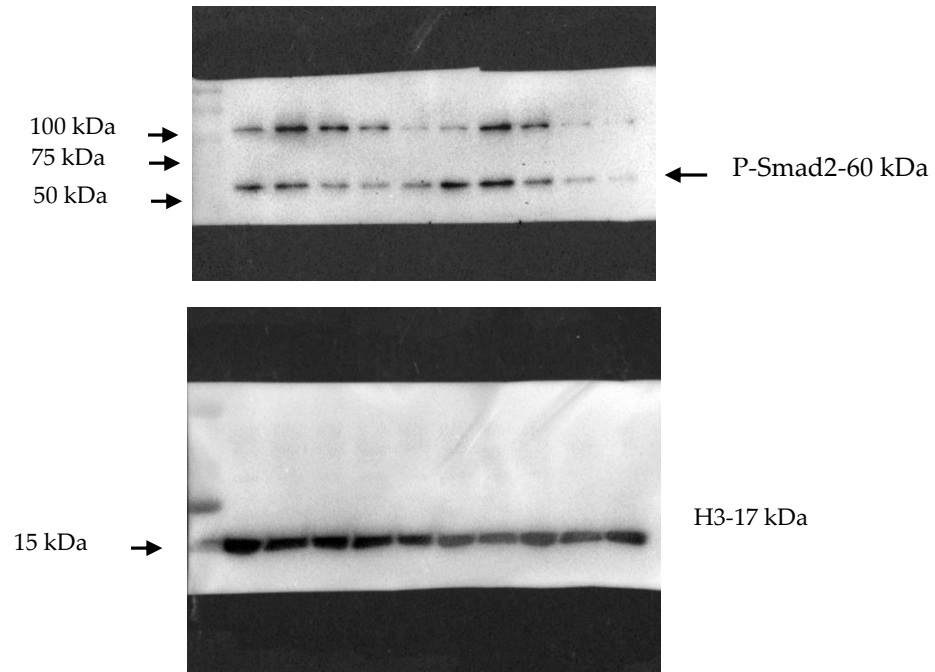

**Figure 4.(A) and (C)**

|         | HT29-DMSO<br>2hr | HT29-NS1643<br>2hr | FET-DMSO<br>2hr | FET-NS1643<br>2hr |
|---------|------------------|--------------------|-----------------|-------------------|
| P-Smad2 | 0.25             | 0.10               | 0.45            | 0.13              |

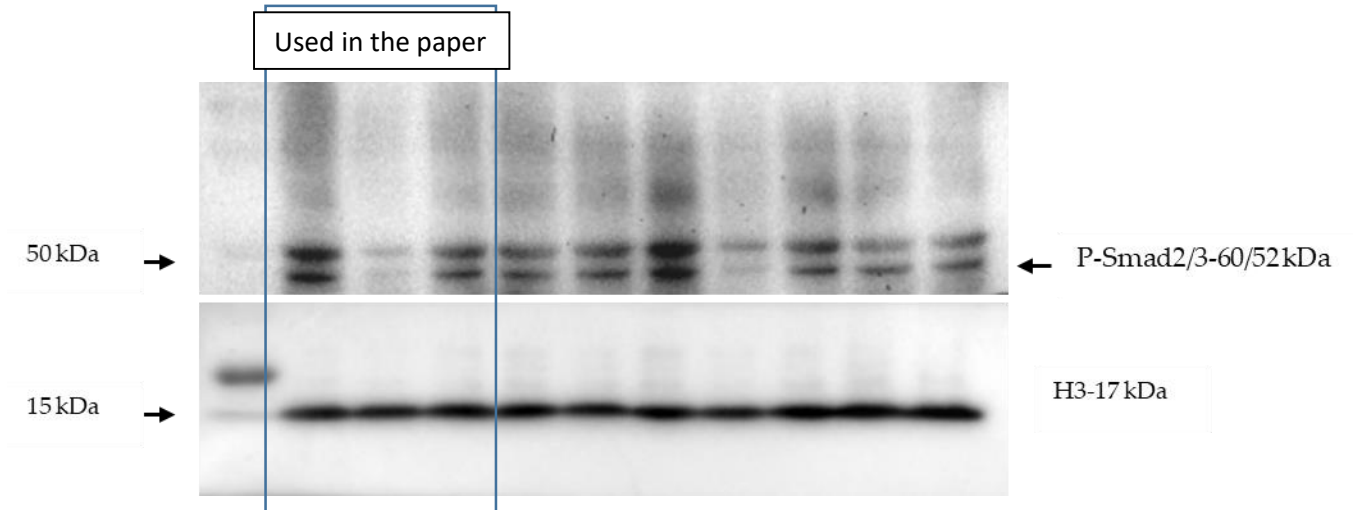

**Figure 4. (D)**

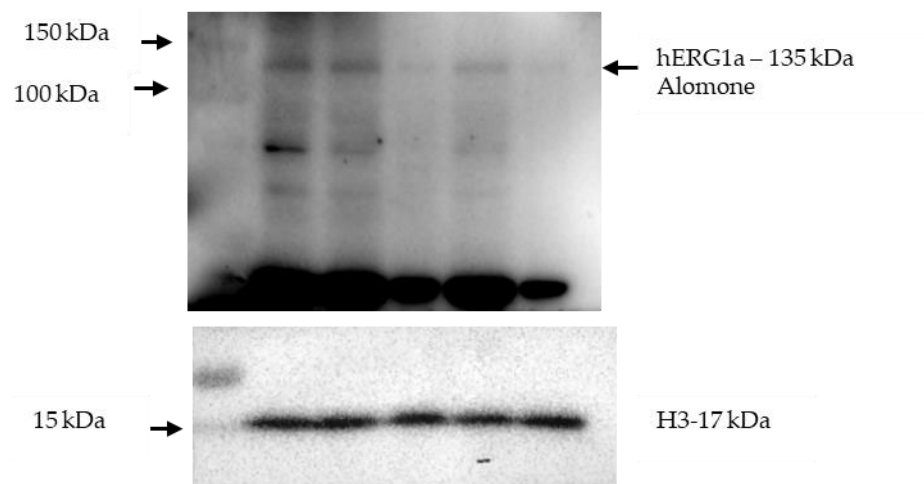

|         | Control | NS1643<br>20 min | SiRNA+NS1643<br>20 min |
|---------|---------|------------------|------------------------|
| P-Smad2 | 30.9    | 9.3              | 19.9                   |
| P-Smad3 | 26.7    | 1.9              | 11.7                   |

**Figure 4. (D)**

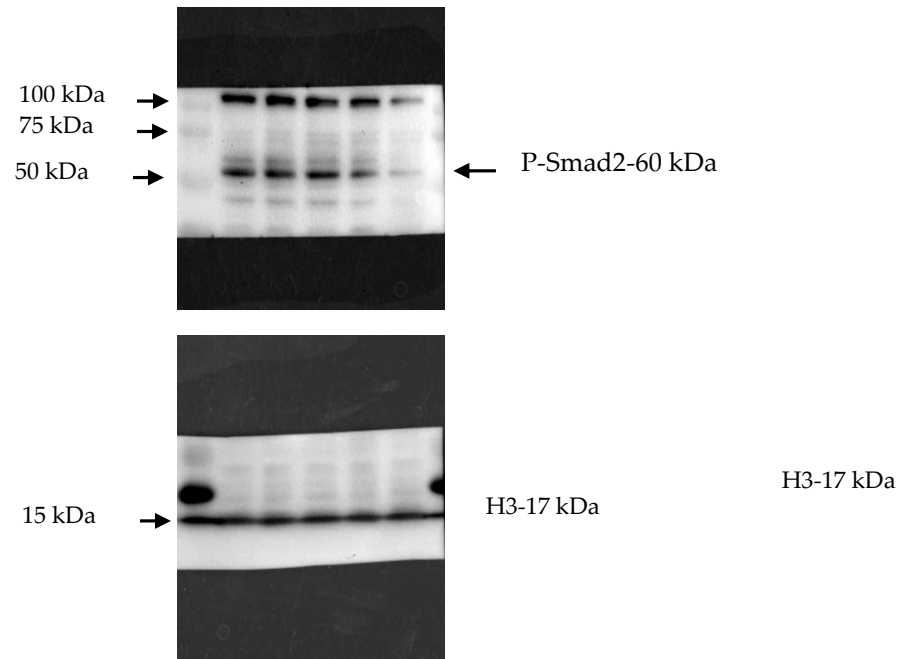

**Figure 4. (B)**

|         | SW480-DMSO<br>2hr | SW480-NS1643<br>2hr |
|---------|-------------------|---------------------|
| P-Smad2 | 0.32              | 0.21                |

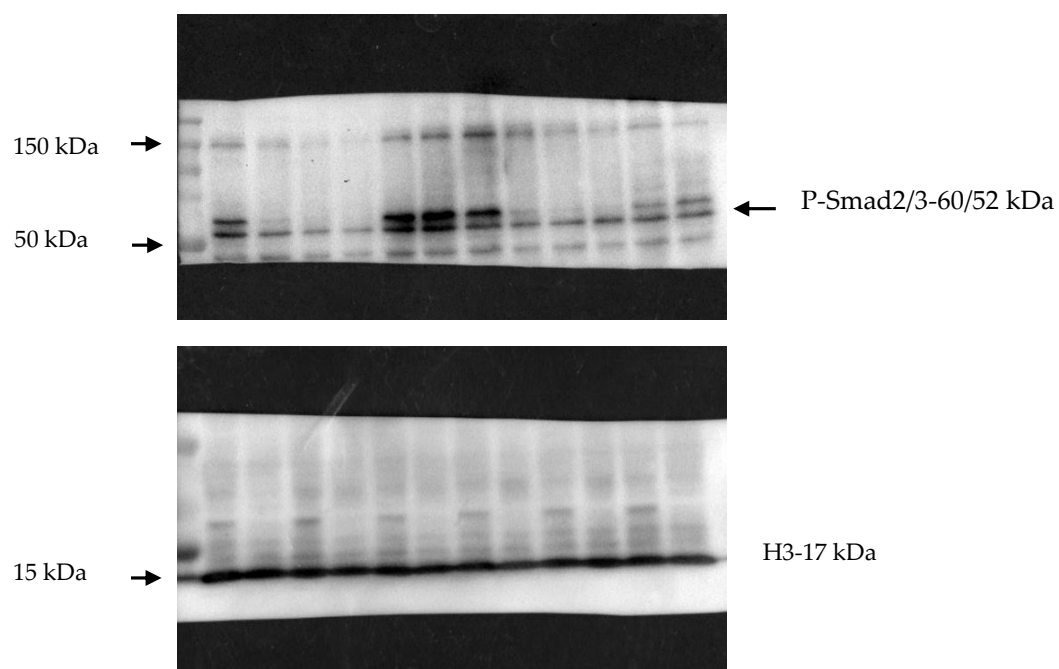

**Figure 5. (A)**

|         | Control | NS1643<br>2hr | TGFβ<br>2hr | TGFβ-NS1643<br>2hr |
|---------|---------|---------------|-------------|--------------------|
| P-Smad2 | 0.15    | 0.02          | 0.20        | 0.02               |
| P-Smad3 | 0.16    | 0.07          | 0.19        | 0.14               |

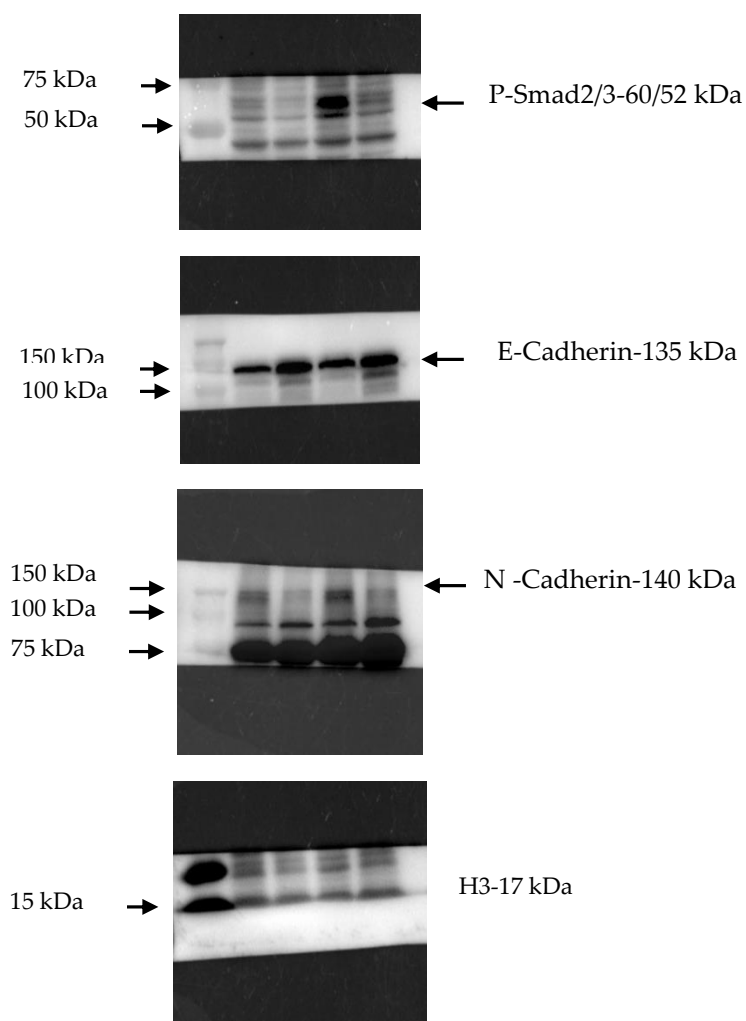

**Figure 5. (B)**

|            | Control | NS1643 | TGFβ  | TGFβ-NS1643 |
|------------|---------|--------|-------|-------------|
| P-Smad2    | 0.013   | 0.004  | 0.414 | 0.029       |
| P-Smad3    | 0.061   | 0.043  | 0.108 | 0.048       |
| E-Cadherin | 0.36    | 0.72   | 0.50  | 0.75        |
| N-Cadherin | 0.05    | 0.01   | 0.30  | 0.01        |



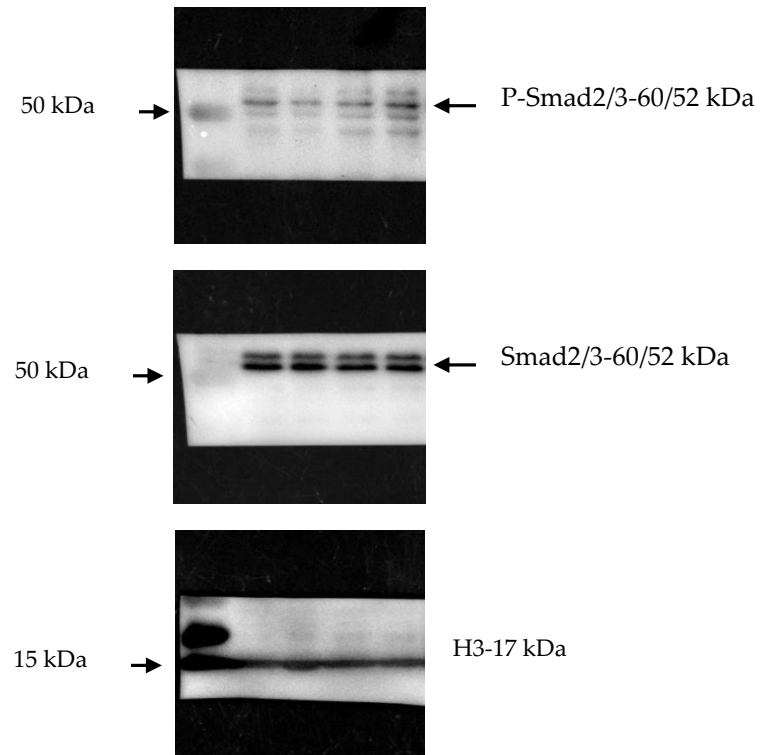

**Figure 6. (A)**

|         | Control | NS1643 | EDTA  | EDTA-NS1643 |
|---------|---------|--------|-------|-------------|
| P-Smad2 | 0.011   | 0.004  | 0.011 | 0.014       |
| P-Smad3 | 0.112   | 0.074  | 0.095 | 0.129       |
| Smad2   | 0.11    | 0.10   | 0.12  | 0.13        |
| Smad3   | 0.38    | 0.34   | 0.31  | 0.35        |

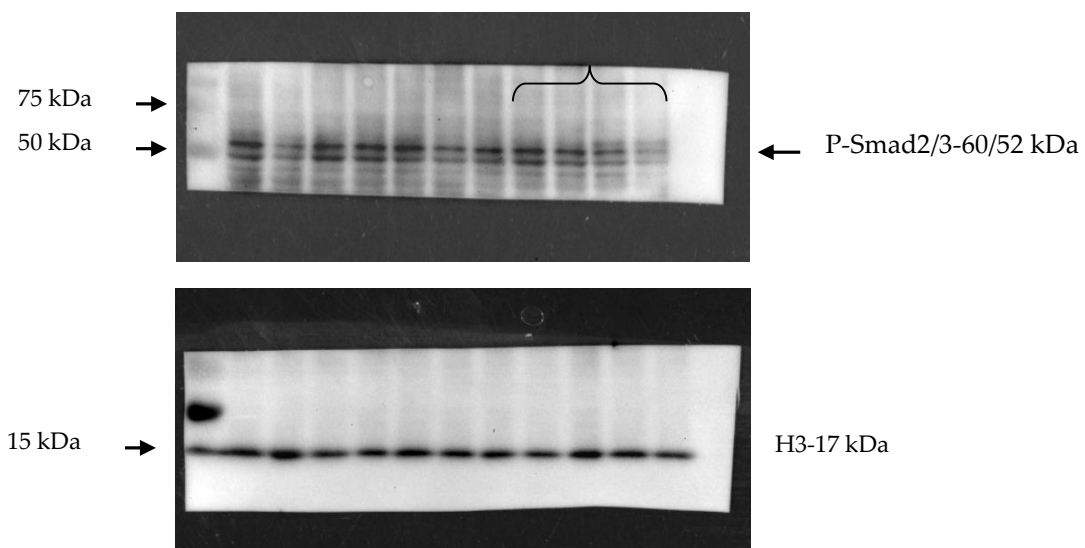

**Figure 6. (B)**

|         | Control | NS1643 | Sanguinarine | Sanguinarine-NS1643 |
|---------|---------|--------|--------------|---------------------|
| P-Smad2 | 0.26    | 0.19   | 0.10         | 0.06                |
| P-Smad3 | 0.16    | 0.10   | 0.09         | 0.05                |

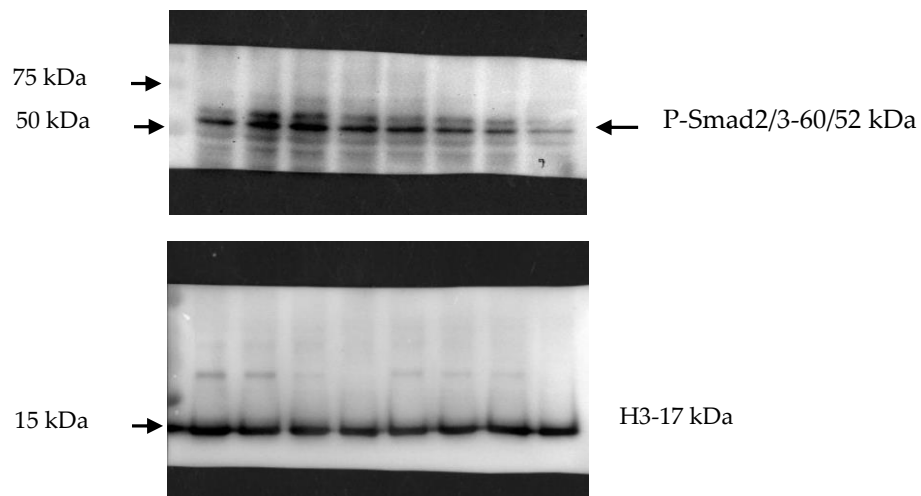

**Figure 6. (C) CSA - NS1643**

|         | Control | CSA<br>15 min | Control | NS1643<br>15 min |
|---------|---------|---------------|---------|------------------|
| P-Smad2 | 0.015   | 0.015         | 0.015   | 0.006            |
| P-Smad3 | 0.089   | 0.080         | 0.109   | 0.033            |

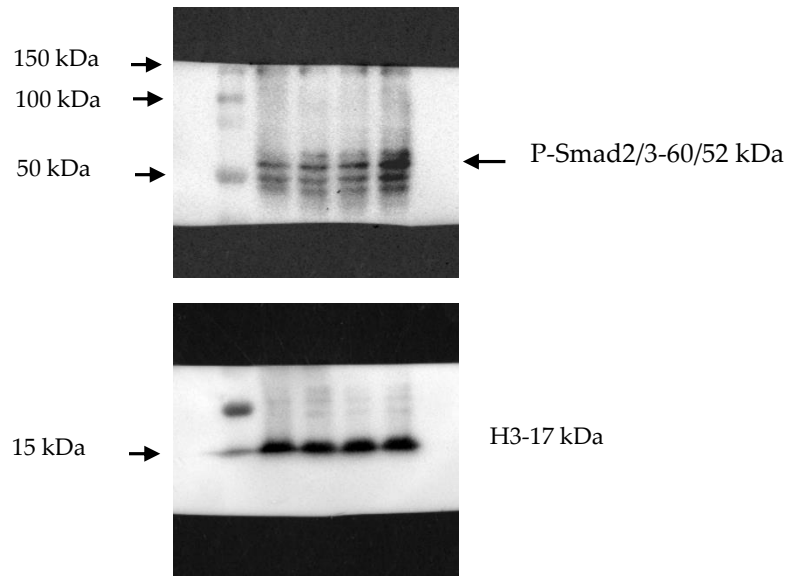

**Figure 6. (C)NS1643+CSA**

|         | Control | NS1643-CSA<br>15 min |
|---------|---------|----------------------|
| P-Smad2 | 0.055   | 0.098                |
| P-Smad3 | 0.034   | 0.054                |

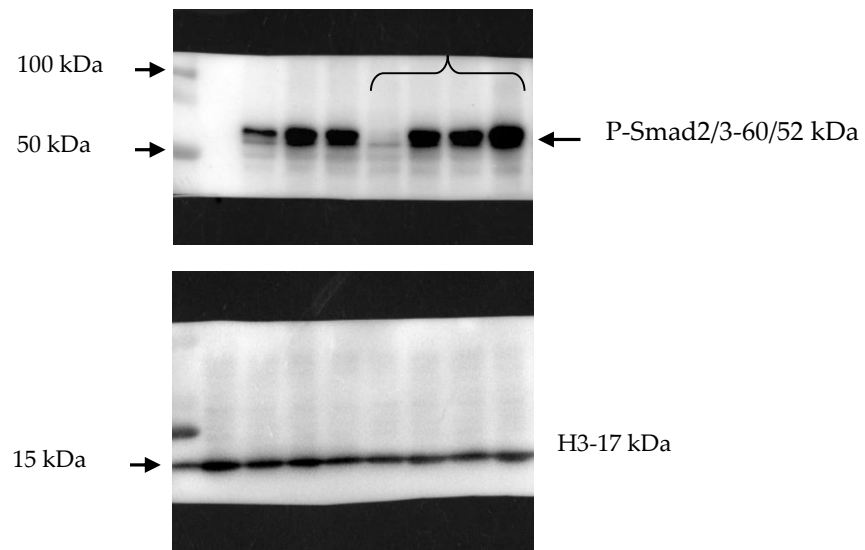

**Figure 6. (C)TGFβ1**

|         | Control | TGFβ<br>15 min |
|---------|---------|----------------|
| P-Smad2 | 0.044   | 0.881          |
| P-Smad3 | 0.079   | 0.672          |

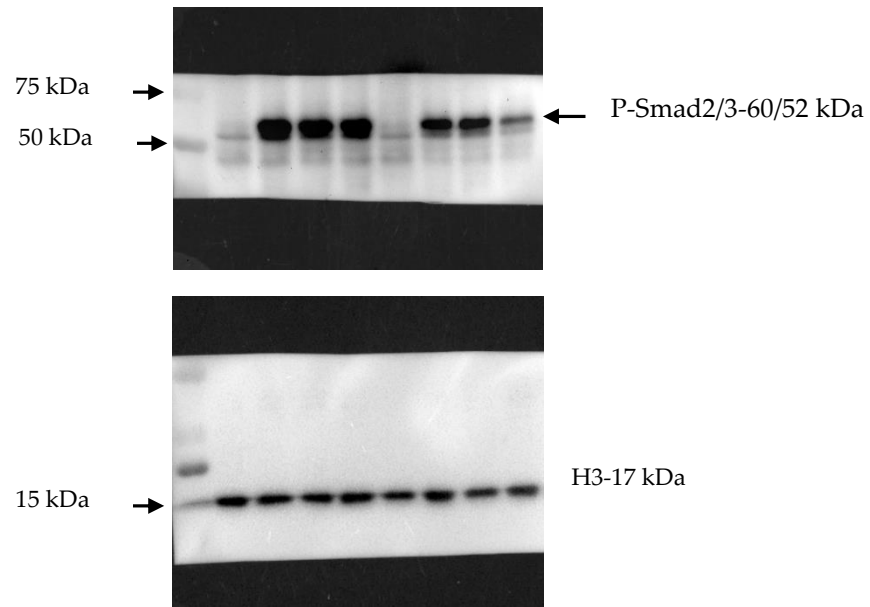

**Figure 6. (C)** NS1643+TGF $\beta$ 1+CSA – NS1643+TGF $\beta$ 1

|         | Control | NS1643-TGF $\beta$ 1 -CSA<br>15 min | Control | NS1643-TGF $\beta$ 1<br>15 min |
|---------|---------|-------------------------------------|---------|--------------------------------|
| P-Smad2 | 0.034   | 0.612                               | 0.009   | 0.462                          |
| P-Smad3 | 0.123   | 0.524                               | 0.070   | 0.124                          |

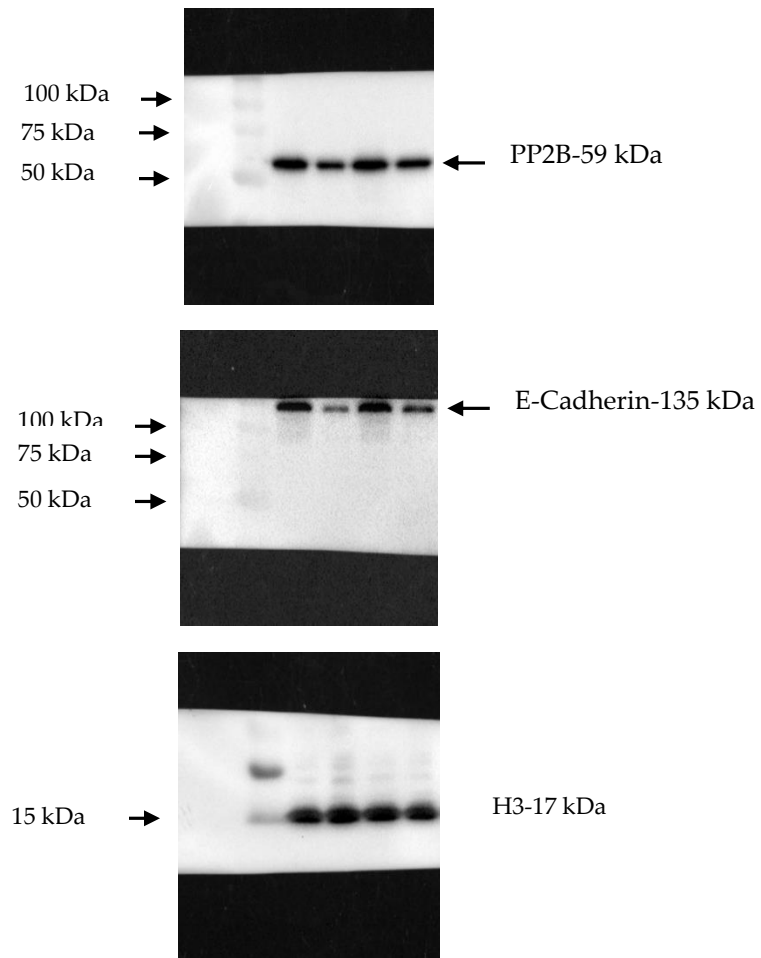

Figure 7. (E)

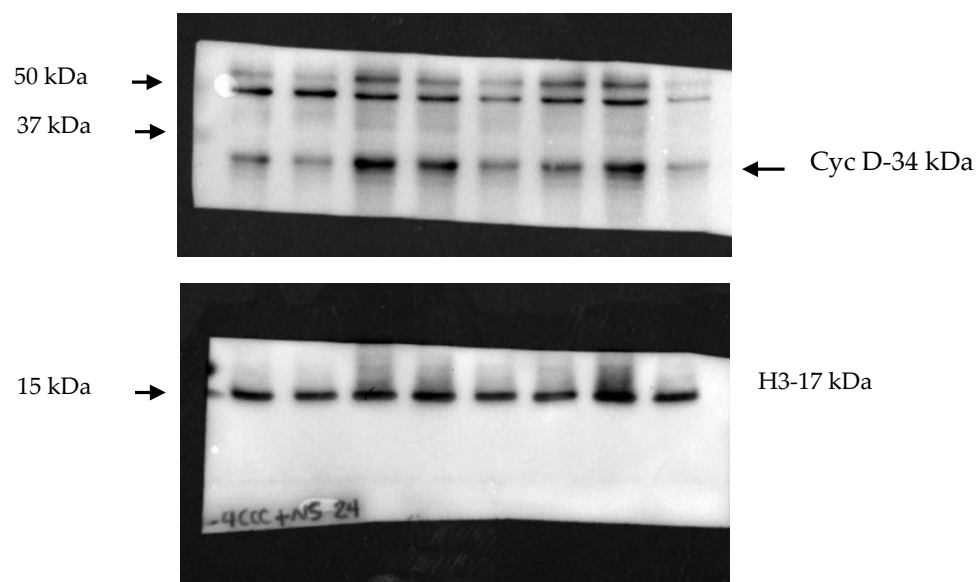

**Supplementary Figure 1. (A)**

|       | HT29-DMSO | HT29-NS1643 | SW480-DMSO | SW480-NS1643 | FET-DMSO | FET-NS1643 |
|-------|-----------|-------------|------------|--------------|----------|------------|
| Cyc D | 0.52      | 0.35        | 1.22       | 0.68         | 0.90     | 0.23       |

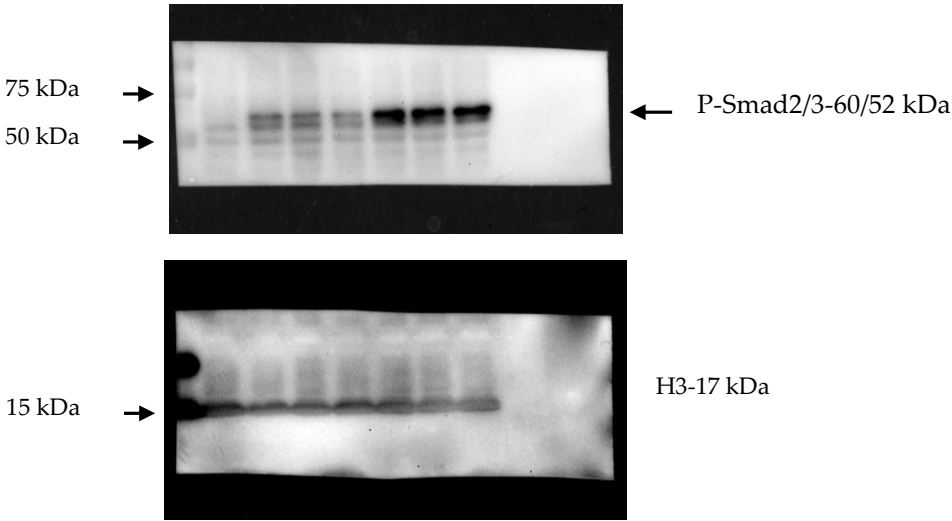

Supplementary Figure2. (A)

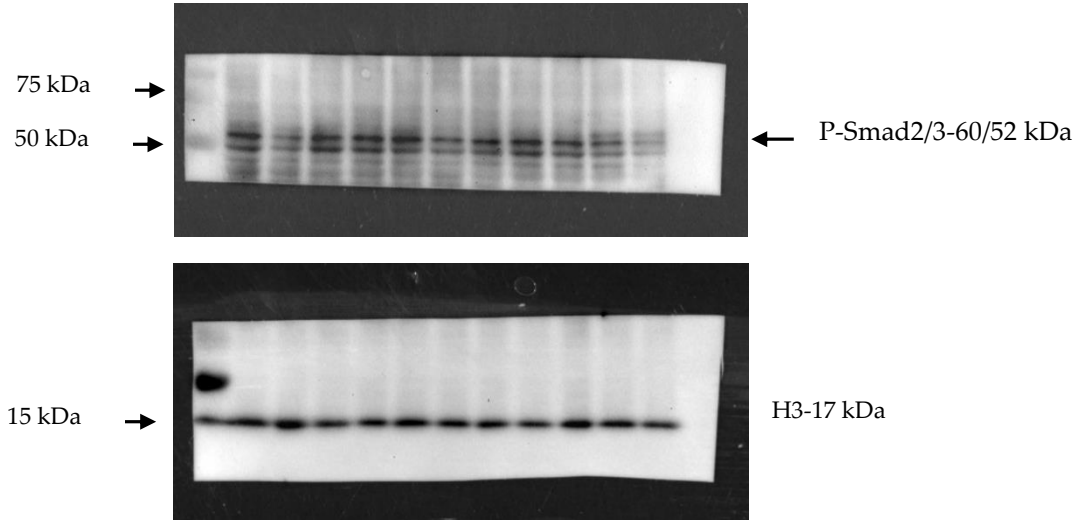

Supplementary Figure2. (B) and (E)

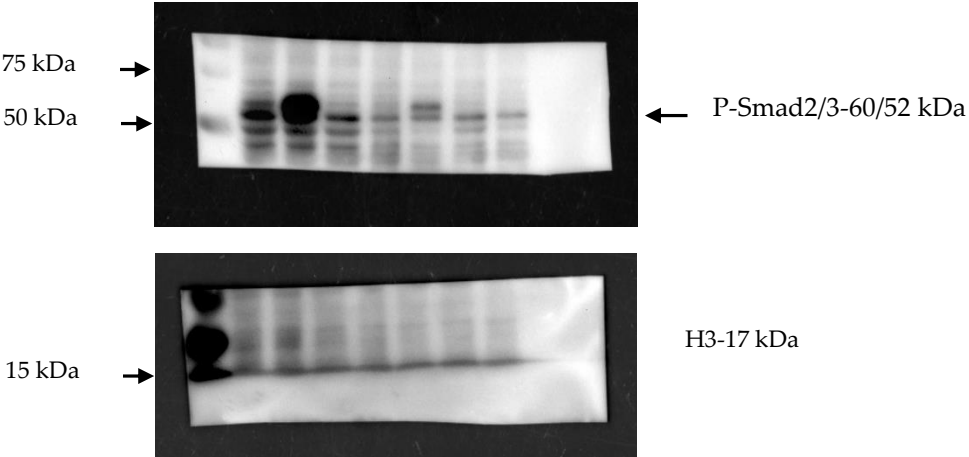

Supplementary Figure2. (F)
